# Supplementary material for: Microbiota of the Gut-Lymph Node Axis: Depletion of Mucosa-Associated Segmented Filamentous Bacteria and Enrichment of Methanobrevibacter by Colistin Sulfate and Linco-Spectin in Pigs
Source: Front Microbiol. 2019 Apr 11;10:599. doi: 10.3389/fmicb.2019.00599 (PMC6470194; doi:10.3389/fmicb.2019.00599)
Supplement: Supplementary file 2 [file Table_2.XLSX]

## Sheet: Tabelle1
Ingredients used for the lymph node agar
Lymph node agar
20g lymph nodes (homogenised)/ litre
15g Agar/litre
pH 7.421
1The pH has not been adjusted.
