# Supplementary material for: Microbiota of the Gut-Lymph Node Axis: Depletion of Mucosa-Associated Segmented Filamentous Bacteria and Enrichment of Methanobrevibacter by Colistin Sulfate and Linco-Spectin in Pigs
Source: Front Microbiol. 2019 Apr 11;10:599. doi: 10.3389/fmicb.2019.00599 (PMC6470194; doi:10.3389/fmicb.2019.00599)
Supplement: Supplementary file 8 [file Table_8.xlsx]

## Sheet: Tabelle1
Comparison of isolates with Illumina sequence representative OTUs
Group	Isolation agar	Best NCBI BLASTn hit	NCBI Accession number	NCBI Similarity (%)	Similarity Illumina seq rep set (%)	E value BLASTn Illumina seq
C	1/10 TSA	Bacillus circulans	KF254671.1	99	-	-
C	blood	Bacillus megaterium	AB681146.1	99	98	5.81e-134
AB	1/10 TSA	Bacillus niabensis	NR_043334.1	99	98	1.27e-125
C	blood	Bacillus thuringiensis	KP419970.1	100	100	5.81e-134
AB	blood	Brevibacterium senegalense	NR_118221.1	99	100	1.26e-130
C, AB	blood(*), ICLN*, 1/10 TSA(*)	Corynebacterium casei	NR_122062.1	99	100	3.09e-116
C	ICLN*	Corynebacterium glutamicum	CP005959.1	99	100	1.62e-134
C	TSA*	Corynebacterium stationis	FJ172668.1	99	99	8.21e-138
AB	TSA(*)	Corynebacterium xerosis	KF928790.1	99	100	1.62e-134
C	TSA*	Dietzia aurantiaca	NR_108518.1	99	100	1.26e-130
C, AB	TSA(*), 1/10 TSA(*), blood(*), ICLN(*)	Escherichia coli	CP011018.1	99	-	-
AB	blood	Micrococcus luteus	KF030221.1	99	-	-
C	ICLN*	Micrococcus yunnanensis	KP209425.1	100	-	-
AB	blood	Pantoea agglomerans	FJ756347.1	99	100	5.81e-134
C	1/10 TSA*	Pseudomonas oryzihabitans	KM019821.1	100	-	-
C	blood	Staphylococcus capitis	LN866849.1	100	100	5.81e-134
AB	TSA	Staphylococcus equorum	KM036089.1	100	100	2.09e-133
C, AB	TSA, blood	Staphylococcus sciuri	AB697711.1	99	100	5.81e-134
C, AB	TSA , blood, 1/10 TSA(*), ICLN	Streptococcus alactolyticus	EU728776.1	100	100	9.67e-132
C, AB	blood, TSA*	Streptococcus hyointestinalis	JN613172.1	99	-	-
